1 **THE INDUCTION OF LARVAL RESOURCE PREFERENCE IN HETEROGENEOUS HABITATS**

2 Vrinda Ravi Kumar<sup>1\*</sup>, Swastika Issar<sup>1,2</sup> and Deepa Agashe<sup>1\*</sup>

3

4 <sup>1</sup>National Centre for Biological Sciences

5 Tata Institute of Fundamental Research

6 Bellary Road, Bangalore, India 560065

7

8 <sup>2</sup>Current address:

9 Department of Zoology

10 University of Cambridge

11 Downing Street, United Kingdom

12

13 \*Corresponding authors:

14 [vrindark@ncbs.res.in](mailto:vrindark@ncbs.res.in)

15 [dagashe@ncbs.res.in](mailto:dagashe@ncbs.res.in)

16

17 **Keywords:** resource preference, diet breadth, *Tribolium castaneum*, habitat heterogeneity, resource experience,

18 novel resources

19 **ABSTRACT**

20 Animals often have to evaluate and choose between multiple food sources in their habitat, and these potentially  
21 complex decisions can have a large impact on their fitness. Among other factors, previous experience with an  
22 alternative resource can significantly increase subsequent preference for the resource ("induction of preference").  
23 Such induction of resource preference is particularly relevant in spatially or temporally heterogeneous habitats.  
24 Although most mobile species – especially generalists – probably frequently encounter habitat heterogeneity, the  
25 impact of preference induction on individual behaviour and fitness in heterogeneous habitats is poorly  
26 understood. We analysed larval preference induction in wheat-adapted generalist red flour beetles (*Tribolium*  
27 *castaneum*) under three types of habitat heterogeneity. We first analysed the induction of larval preference for  
28 novel resources (other cereal flours) under temporal heterogeneity, exposing larvae to new resources during  
29 development. We found that larvae preferred a new resource if they experienced it recently, but that the  
30 magnitude of induction varied across resources. Interestingly, we also observed specific induction for a  
31 homogenous mix of wheat and a novel resource, with larvae preferring the mix over either pure resource. To  
32 analyse induction under spatial heterogeneity, we placed beetle eggs in one of two alternative resource patches  
33 and tested the preference of emerged larvae. Unexpectedly, hatching into a novel resource did not always induce  
34 preference. Finally, we found that induction of preference for new resources could be maladaptive for larval  
35 development. Together, our work demonstrates that experience-based plasticity of larval resource choice may  
36 strongly impact larval preference and fitness in heterogeneous habitats.

## 37 INTRODUCTION

38 Insects occupy a large diversity of dietary niches, and a substantial body of work has thus focused on  
39 understanding insect resource choice. Changes in resource preference can facilitate dietary niche shifts (Agosta  
40 2006), potentially leading to divergence in host-associated traits (Singer & McBride 2010). Thus far, most  
41 studies of resource choice in holometabolous insects have analyzed only adult preference, since it is often well  
42 correlated with larval performance (Dethier 1959; Jaenike 1978; Gripenberg et al. 2010). However, many larvae  
43 also exhibit resource choice (Jermy et al. 1968; Berdegue & Trumble 1996; Bernays & Weiss 1996; Gamberale-  
44 Stille et al. 2014) and are capable of exploring different habitat patches over smaller spatial scales (Abbott &  
45 Dukas 2016). Thus, even though adult oviposition preference often determines larval resource use, it is important  
46 to study larval choice in spatially heterogeneous environments, where larval preference may also contribute  
47 substantially to larval fitness. Under such conditions, it is possible that resource choice is not the sole domain of  
48 the adult, and may instead be shared across stages (Wiklund 1975; Chew 1977; Berdegue et al. 1998;  
49 Gamberale-Stille et al. 2014; Abbott & Dukas 2016). However, because larval preference is relatively  
50 understudied, we do not know the impact of larval preference on larval fitness in heterogeneous environments.

51  
52 What factors shape larval preference in heterogeneous habitats? A large body of work suggests that prior  
53 experience with alternative resources can strongly shape larval preference. Many Lepidopteran larvae show  
54 “induction of preference”: an increased preference for host plants that they have experienced previously (Jermy  
55 et al. 1968; Bernays & Weiss 1996; Carlsson et al. 1999; del Campo et al. 2001; Henniges-Janssen et al. 2014;  
56 Soler et al. 2012; Gretes et al. 2016). A particularly striking example is the induction of preference in *Manduca*  
57 *sexta*. While naïve larvae can feed and survive on many host plants, larvae that feed on solanaceous foliage  
58 become specialized and reject other hosts (Schoonhoven 1967; Yamamoto 1974; del Campo & Renwick 2000).  
59 Similar induction of preference also occurs in some non-Lepidopteran insects (Phillips 1977). Although  
60 preference induction thus seems to be common across insects, little is known about its occurrence in natural  
61 conditions and its impact on insect fitness. Previous studies suggest that the induction of preference could lead to  
62 increased acceptability of the inducing host, improving subsequent insect performance on it through higher

63 feeding and/or physiological acclimation (Schoonhoven & Meerman 1978; Scriber 1979; Karowe 1989; Agrawal  
64 et al. 2002). However, these studies focus on mechanistic aspects of experience-mediated changes in food  
65 acceptability and digestive efficiency, leaving fundamental questions about the induction of preference under  
66 resource heterogeneity unanswered. For instance, we do not know the impact of experience with temporally or  
67 spatially heterogeneous resources on larval preference, and consequently on larval resource use. This is  
68 particularly important since most animals probably encounter significant habitat heterogeneity over their  
69 lifespan. Larval movement in a heterogeneous habitat could result in larvae simultaneously or sequentially  
70 experiencing different resources, but how does the induction of preference operate in such cases? For instance,  
71 does the duration of exposure to a resource impact preference, or is preference determined during a specific  
72 developmental period? Does the magnitude of induction vary depending on available resources? Does induction  
73 by the natal resource dictate larval resource choice in a patchy habitat (as is often assumed), or does the presence  
74 of alternative resources decrease the impact of the natal experience on larval choice? Finally, is the induction of  
75 larval preference adaptive?

76  
77 To address these questions, we tested the occurrence and strength of induction of larval resource preference in a  
78 generalist insect pest of stored grain flour – the red flour beetle *Tribolium castaneum* (Sokoloff 1974; Ziegler  
79 1976). Flour beetles are strong dispersers and frequently colonize grain warehouses (Naylor 1961; Hagstrum &  
80 Gilbert 1976; Ziegler 1976; Ziegler 1977). Resource availability within storage warehouses fluctuates over time,  
81 and beetles often move across flour patches (Ziegler 1976; Campbell & Hagstrum 2002), experiencing several  
82 resources in their lifetime and potentially exerting resource choice. Prior work suggests that *T. castaneum* larval  
83 preference can oppose adult resource preference: given a choice between the ancestral wheat resource and a  
84 suboptimal novel resource (corn), *T. castaneum* larvae favoured wheat, while adult females preferentially  
85 oviposited in corn (Agashe & Bolnick 2012). At high density, larvae raised in a heterogenous wheat-corn patchy  
86 habitat also preferred corn more strongly than larvae from a homogenous wheat habitat (Parent et al. 2014),  
87 suggesting that prior experience in a heterogeneous habitat alters larval resource choice in the face of  
88 competition. Thus, *T. castaneum* larval choice may determine larval resource use in heterogeneous

89 environments. Here, we examined the role of larval choice and the impacts of resource heterogeneity on larval  
90 resource preference and fitness in *T. castaneum*. We first tested whether individual *T. castaneum* larvae show  
91 induction of preference for four novel resources, given temporal heterogeneity in resource availability  
92 (sequential exposure to alternative resources). Second, we quantified the induction of preference when two  
93 resources were thoroughly mixed and presented simultaneously. Third, we quantified the induction of preference  
94 under spatial resource heterogeneity, wherein alternative resources were presented to the larvae in separate  
95 patches and larvae were free to experience both resources by moving between patches. Finally, we tested the  
96 hypothesis that induction of resource preference is adaptive for larvae.

97

## 98 **METHODS**

### 99 **Beetle stock maintenance and experimental individuals**

100 We generated an outbred laboratory population from 12 wild-collected populations of *T. castaneum* from across  
101 India. We maintained the population at 34 °C ( $\pm$  1°C) in 750g whole-wheat flour (ancestral resource; henceforth  
102 “wheat”) on a 35 day discrete-generation cycle with 2500 to 5000 individuals per generation. *T. castaneum* is a  
103 generalist and can consume a wide variety of resources. We conducted our assays using the ancestral resource  
104 for our population – whole-wheat flour (abbreviated 'W') – and four novel resources: finger millet flour  
105 (*Eleusine coracana*, 'FM'), sorghum flour (*Sorghum bicolor*, 'S'), refined wheat flour (“*maida*” flour, 'RW') and  
106 rice flour (*Oryza sativa*, 'R'). These are among the most common flours used in India; hence, *T. castaneum* is  
107 likely to encounter them in Indian storage warehouses. *T. castaneum* larvae perform best in their ancestral  
108 resource, wheat flour (Figure S1). They show significantly higher mortality in rice flour (~23% drop in survival  
109 compared to wheat), and significantly delayed development in rice and finger millet flours (>100% and ~37%  
110 delay in development rate respectively, relative to wheat) (Figure S1).

111

112 We derived all experimental individuals from generations 12-23 of the outbred stock population. To generate  
113 experimental individuals, we allowed 250-400 randomly picked stock adults (7-14 days post-eclosion) to  
114 oviposit in 150 g of finely sifted wheat flour for 24 hours. We collected eggs and placed each egg in a well of 48-

115 well polystyrene plates (Sigma Costar; hereafter "treatment plates"), with ~1 g of the appropriate resource per  
116 egg. We placed all plates inside a dark incubator maintained at  $34\text{ }^{\circ}\text{C} \pm 1^{\circ}\text{C}$  while larvae developed. Each 48-  
117 well plate contained replicate eggs for a single resource treatment. After 14 days of larval development, we  
118 tested the resource choice of each larva as described below. We tested larval choice on the 15<sup>th</sup> day of  
119 development since at this stage larvae can be easily handled and observed, but still need to feed for a few days  
120 before pupating (hence their resource choice at this stage could have fitness consequences). For each experiment  
121 described below, we aimed to test an equal number of individuals per treatment. However, for various reasons  
122 (e.g. an egg did not hatch, a larva was accidentally killed during handling), the actual sample size differed  
123 slightly across treatments. For clarity, we provide the sample size for each treatment in the relevant figures in the  
124 main text and supplementary information.

125

#### 126 **Testing larval resource choice**

127 We measured larval resource choice in petri-plates containing adjacent patches of two resources. We spread ~0.8  
128 g resource on each half of a 60 mm petri-plate in a thin layer, with no space between the resources except for a  
129 circular area in the center of the plate (17 mm diameter) where we placed the 15 day old larva with no bias in  
130 orientation (Figure S2A). This placement ensured that each larva had the opportunity to sample both resources  
131 presented in the choice test. We noted the position of each larva every 12 hours ( $\pm 1$  hour) for 48 hours. All  
132 larvae were housed in a dark incubator at  $34\text{ }^{\circ}\text{C} (\pm 1^{\circ}\text{C})$ , and were outside the incubator for  $< 2$  hours when we  
133 transferred larvae into new resources (see below) or while we noted larval position during the choice assay. For  
134 each larva, we calculated preference for the novel resource as the percent occurrence in the new resource patch.  
135 Larval tracks visible from the bottom of the petri-plate showed that larvae were capable of exploring the entire  
136 plate in a 12 hour time period. For all our experiments, these tracks confirmed that almost all larvae explore both  
137 resources, even if they showed an extreme preference for either resource. This suggests that larval movement  
138 across time points was not constrained by patch size.

139

140 Initially, we collected data on larval position for 72 hours. However, we found that some larvae from each  
141 treatment pupated towards the end of this period. Since pupae are non-feeding, data collected close to pupation  
142 may be unreliable with respect to feeding choice. For larvae that did not pupate in 72 hours, we found that larval  
143 preference calculated after 48 hours was well correlated (Spearman correlation coefficient > 0.8) with preference  
144 calculated from 72 hours of data (Figure S3). Hence, for subsequent experiments, we only collected 48 hours of  
145 data on larval position (4 data points per larva). On average, <1% of the larvae pupated during the 48 hour  
146 period across all treatments, and these were excluded from subsequent analysis.

147

148 Our assay assumes that larval presence in a resource patch indicates foraging in that patch, and that time spent  
149 foraging in a patch is proportional to the time spent feeding in that patch. If the larva was not visible during  
150 readings, we used a pair of forceps to gently move through the resource patches until the larva was found. If the  
151 larva was found in contact with both resource patches during a reading, it was noted as being present in both  
152 resources. Outside of the duration of larval transfers into new resources and the reading during the choice assay,  
153 all larvae were held in a dark incubator at 34 °C ( $\pm 1^\circ\text{C}$ ). Since the resources we used have different textures, we  
154 measured differences in larval mobility in each resource to account for resource-specific movement rates. We did  
155 this by measuring the number of times larvae moved across patches of the same resource in a similar setup  
156 (Figure S2B). Larval movement rate was similar across resources, suggesting that slower larval movement in  
157 novel resources does not confound our measure of larval preference for the novel resource (Figure S4).

158

### 159 **Analyzing data to test for induction of larval preference**

160 To test the impact of temporal resource heterogeneity on the occurrence and magnitude of induction of  
161 preference, we exposed larvae to alternative resources either sequentially or simultaneously. To measure  
162 induction, we compared the resource preference of test larvae (given prior experience with a novel resource) to  
163 the preference of control larvae that had never experienced the novel resource (i.e. that had developed for 14  
164 days only in wheat). A significantly higher preference for the new resource in test vs. control larvae would

165 indicate induction of preference. For example, if rice patch occupancy of control larvae was ~20%, but was  
166 ~60% for larvae exposed to rice during development, this would indicate an induced preference for rice.

167

168 We conducted all statistical analyses in R (R core team, 2016) using RStudio (RStudio team, 2015). For each  
169 experimental treatment measuring larval resource choice, we had position data for four time points per  
170 individual. We measured preference for a novel resource as patch occupancy, i.e. the proportion of times (out of  
171 4 measured) that a larva was observed in the novel resource. Since our measurements uncover strong and  
172 repeatable patterns of preference across blocks (not reported here) and we find that larvae frequently explore  
173 both patches within a 12-hour time window, this measure reflects true preference rather than sequential auto-  
174 correlation between time points. We used a generalised linear model with binomial errors and a logit link  
175 function to test whether patch occupancy differed significantly between control larvae and test larvae from the  
176 same experiment, unless mentioned otherwise. The odds ratio calculated from the fitted model coefficients is  
177 reported as the fold increase in patch occupancy in a treatment relative to the control. For example, a three-fold  
178 increase in preference (i.e. patch occupancy) for a novel resource in a treatment indicates that the larvae in this  
179 treatment were three times more likely than the control larvae to choose the novel resource.

180

### 181 **Testing preference induction with temporal resource heterogeneity**

182 To test whether induction of resource preference depends on the timing of experience with a resource, we  
183 changed the resource available to larvae at different time points during development. For instance, to test the  
184 effect of early vs. late experience, we allowed larvae to experience a novel resource only during the first or the  
185 second week of development. The remaining development was completed in the ancestral resource. For this  
186 experiment, we placed eggs in a specific resource for the first week of development (as described above). To  
187 change larval exposure to a resource, we pooled week-old replicate individuals from a treatment plate and sifted  
188 them out of the resource using a fine sieve. The first resource was shaken off from their body during the sifting  
189 process. We used a fine brush to place each larva into a well of a clean 48-well plate containing the second  
190 resource. For treatments that required exposure to a single resource throughout larval development, we followed



191 the same procedure at the 1-week time point, but placed larvae in fresh resource of the same type. We used this  
192 protocol to test the impact of larval experience with distinct resources at various time points. Therefore, we  
193 measured the impact of early (only first week of development), late (only second week of development) or  
194 continuous experience (both weeks of development) with four novel resources, on larval preference for the novel  
195 resource.

196

197 To test the impact of larval experience with finger millet immediately prior to the choice assay, we followed the  
198 above protocol, but allowed larvae to develop in the first resource for 13 days and then transferred them to the  
199 second resource for 1 day. On the following day (day 15), we measured larval preference as above. Therefore,  
200 we had four treatments – larvae that only experienced either wheat or finger millet throughout (but were  
201 transferred on day 13 to control for the impact of transfer), larvae that developed for 13 days in either wheat (or  
202 finger millet) but saw finger millet (or wheat, respectively) one day before the choice test.

203

#### 204 **Testing specificity of the induced preference**

205 We tested whether larval preference induced by a particular resource was specific to the experienced resource  
206 rather than a generalized acceptance of any new resource. We allowed larvae to develop in one of three  
207 treatments for 14 days: no exposure to finger millet, second week exposure to finger millet, or complete  
208 development in finger millet. On the 15<sup>th</sup> day, we gave each larva a choice between the ancestral resource  
209 (wheat) and one of the four novel resources (finger millet, sorghum, refined wheat and rice). An increased  
210 preference only for finger millet would indicate that the induced preference is specific to the experienced  
211 resource and is not a general increased acceptance of any novel resource. Another possibility is that experience  
212 with a novel resource increases repulsion from the ancestral resource, which may be interpreted as increased  
213 preference for the novel resource in our assays. To test this, we allowed larvae to develop in one of four  
214 treatments for 14 days: no exposure to finger millet, only first week or second week exposure to finger millet,  
215 and complete development in finger millet. On the 15<sup>th</sup> day, we gave larvae a choice between two novel  
216 resources: sorghum and finger millet. If exposure to finger millet did not increase repulsion from wheat, then

217 larvae would still choose finger millet in this assay. These two experiments allowed us to confirm that the  
218 induction of preference is indeed a specific increased preference for the experienced resource, rather than  
219 repulsion from the ancestral wheat resource.

220

### 221 **Testing preference induction with homogeneous resource mixes**

222 To measure the impact of simultaneous experience with two resources on larval preference, we weighed out  
223 equal amounts of two resources (wheat and finger millet). We mixed these together so that larvae would not be  
224 able to choose between the two resources while feeding (as in Parent et al. 2014). We collected eggs from stock  
225 beetles and allowed larvae to hatch and develop individually for 14 days in pure wheat, pure finger millet  
226 ("FM"), or the homogeneous mix (50% finger millet by weight) of the two resources. In three separate  
227 experiments, we then tested the preference of larvae from each of these treatments, given the following choice  
228 combinations - wheat versus finger millet, wheat versus the 50% mix, or the 50% mix versus finger millet. To  
229 test whether larvae were able to distinguish between small differences in finger millet concentrations in a  
230 homogeneous mix, we allowed larvae to experience the 50% homogeneous FM-wheat mix and gave them the  
231 following choices: 25% FM (in wheat, as above) versus 50% FM; 75% FM versus 50% FM; and 25% FM versus  
232 75% FM. After experiencing a 50% mix, if larvae preferred it over other concentrations (such as 25% FM and  
233 75% FM), this would demonstrate very high specificity of the induced preference. We confirmed that none of the  
234 resource mixes decreased larval survival, though the 75% FM mix did delay larval development (Figure S1).

235

### 236 **Testing preference induction with spatial heterogeneity in resource availability**

237 To measure larval preference induction in a spatially heterogeneous patchy habitat, we directly placed eggs from  
238 stock individuals in a two-patch habitat containing the ancestral resource and a novel resource. To create the  
239 patchy habitat, we spread a thin layer of ~1 g resource on either half of 60 mm petri-plates. We placed an egg in  
240 one patch of this habitat with a fine brush, and allowed it to develop undisturbed for 14 days (one egg per petri-  
241 plate). During development, larvae were free to move across patches and consume the resource of their choice.

242 After 14 days, we noted the position of each larva as an overall indicator of larval preference during  
243 development and tested its resource preference as described above.

244

#### 245 **Estimating the impact of larval choice on larval fitness**

246 To determine the fitness consequences of experience-mediated larval resource choice, we collected eggs from  
247 the stock population and measured larval survival and development rate under conditions of temporal  
248 heterogeneity in resource availability. We exposed larvae to wheat or finger millet during the first, second and  
249 third week of development, alternating between the two resources. Larvae in control groups experienced  
250 homogeneous conditions and experienced either wheat or finger millet throughout (but were transferred to fresh  
251 flour each week). This experimental design mimicked larval resource use under spatial as well as temporal  
252 heterogeneity, if larvae acted on their resource preference. For example, while exploring a heterogeneous habitat,  
253 if a larva experienced finger millet and increasingly preferred it to wheat, it would consume largely finger millet  
254 during the remainder of its development. Larvae from the wheat-finger millet-finger millet treatment would  
255 represent this scenario, allowing us to determine the fitness impact of induced preference for finger millet  
256 relative to larvae that never experienced finger millet (i.e. the wheat-wheat-wheat controls). Note that if we  
257 measured larval fitness in a patchy habitat, we would not be able to determine which resource larvae had  
258 consumed, and would thus be unable to connect preference to fitness. After three weeks of development, we  
259 counted the number of surviving larvae and noted their developmental stage. A higher proportion of adults  
260 and/or pupae would indicate faster development, which is typically beneficial for early reproduction and reduced  
261 probability of larval parasitism (A. Fred West 1960; Blaser & Schmid-Hempel 2005). We used a generalised  
262 linear model with binomially distributed errors and a logit link function to test whether the proportion of live  
263 individuals and proportion of pupae or adults out of all live individuals were significantly different across  
264 treatments.

265

## 266 **RESULTS**

### 267 **Induction of larval preference for new resources is time-sensitive and resource-specific**

268 We tested whether prior experience with four new resources – finger millet, sorghum, refined wheat and rice  
269 flour – could elicit an induction of preference for these resources. We exposed larvae to one of four treatments –  
270 no exposure to the novel resource (control), exposure either during the first or second week of development, and  
271 exposure throughout development. We found that prior experience with a new resource typically increased larval  
272 preference for that resource, compared to the baseline preference shown by control larvae (Figure 1, Table S1).  
273 However, this induction of preference occurred only when larvae were exposed to the novel resource during the  
274 second week of development. In contrast, when early experience with a new resource was followed by a week in  
275 wheat flour, larvae did not show an increased preference for the novel resource. The only exception to these  
276 patterns was rice flour. Both baseline and induced preference for rice flour were very low, indicating that larvae  
277 are extremely averse to rice (Figure 1D). In contrast to the results for other resources, larvae exposed to rice  
278 flour during the first week of development showed a reduced preference for rice, although the effect size was  
279 very low (Figure 1D, Table S1).

280

281 Overall, the magnitude of the induction of preference varied across resources, with a greater than six-fold  
282 increase in preference for finger millet (Figure 1A) but a modest two-fold increase for sorghum (Figure 1B) and  
283 refined wheat (Figure 1C) (Table S1). We found that an individual's sex did not significantly affect the  
284 magnitude of preference induction (Figure S6). Interestingly, longer exposure to the new resource (for 2 weeks)  
285 also did not alter the effect size of preference induction, except for a decrease in preference for finger millet with  
286 longer exposure (compare the last two bar plots in Figure 1A; Table S1). For the following experiments, we  
287 focused on finger millet flour, which showed the largest effect size for induction of preference.

288

289 As described above, recent (2<sup>nd</sup> week only) but not early (1<sup>st</sup> week only) experience with a new resource induced  
290 preference for the resource. However, it was unclear whether induction of preference was contingent on the  
291 developmental stage (i.e. the second week of larval development) or on exposure to the novel resource  
292 immediately prior to the preference test. Thus, we tested whether reducing the period of later experience could

293 still induce preference. We found that even one day of exposure to finger millet immediately before the choice  
294 test was sufficient to induce preference, albeit with a decrease in the effect size (Figure 2, Table S2). Notably,  
295 one day of exposure to wheat was also enough to counter the effects of previous exposure to finger millet for  
296 thirteen days (Figure 2). These results strongly suggest that recent exposure to finger millet, rather than exposure  
297 during a specific developmental stage, is critical for induction of larval preference for finger millet.

298

299 Next, we tested whether the induction of larval preference for finger millet flour is specific to finger millet, or is  
300 generalized to other new resources. We found that induction of preference was generally specific to the  
301 experienced resource (Figure S7, Table S3), although we did observe a small increase (~1.8 fold) in preference  
302 for refined wheat flour in larvae exposed to finger millet in the second week of development. Finally, we tested  
303 whether increased occupancy of the finger millet patch in the choice test (Figure 1A) represents repulsion from  
304 wheat flour (ancestral resource) or attraction to finger millet. After the larva had experienced finger millet, we  
305 offered it a choice between finger millet and sorghum. We found that the induction of preference for finger millet  
306 was intact in this novel context, demonstrating that aversion to wheat flour does not explain the induction of  
307 preference observed in finger-millet flour. Taken together, our results demonstrate a specific, experience-  
308 mediated increase in preference for novel resources in flour beetle larvae (Figure S8, Table S4).

309

### 310 **Simultaneous experience with two resources also elicits specific induction of larval preference**

311 In the above experiments, we presented larvae with alternative resources in a temporally distinct manner (i.e.  
312 only one resource at a time). Does induction of preference occur when larvae experience multiple resources  
313 simultaneously, and how specific is the induced larval preference under such conditions? To test this, we  
314 exposed larvae to a homogenous mixture of finger millet flour and wheat flour (1:1 by weight) for fourteen days,  
315 with exposure to pure wheat and pure finger millet flour as controls. On the fifteenth day, we tested whether  
316 larvae from each regime preferred 100% wheat, 100% finger-millet flour, or a 1:1 homogenous mixture of both  
317 flours (henceforth 'mix'). We found that larvae strongly preferred the same resource (or mix) that they had  
318 experienced previously (Figure 3, Table S5). Notably, larvae that were first exposed to the 1:1 mix and then

319 presented with the two pure resources in the choice test showed a strong preference for pure finger millet flour  
320 (Figure 3A). These results suggest that the presence of the ancestral resource does not qualitatively interfere with  
321 preference induction for the novel resource, although the effect size was about half that observed for induction  
322 with pure finger millet (Figure 3A; Table S5A). Interestingly, larvae reared on a 1:1 finger millet-wheat mix did  
323 not distinguish between mixes with different proportions of finger millet and wheat. For example, when given a  
324 choice between the 1:1 mix versus a 25% or a 75% mix, larvae that developed in the 1:1 mix did not show a  
325 preference for the experienced mix (Figure S9). Together, these results show that even half the amount of finger  
326 millet experienced simultaneously with wheat can induce preference for finger millet; but larvae are unable to  
327 distinguish quantitatively between resources mixes with different proportions of finger millet.

328

### 329 **Impact of spatial habitat heterogeneity on induction of preference**

330 Next, we tested whether a spatially heterogeneous habitat can alter larval preference via induction. We placed  
331 individual eggs in one patch of a two-patch habitat containing the ancestral wheat resource, and either finger-  
332 millet ("FM") flour or refined wheat ("RW") as a new resource. Larvae developed while moving freely across  
333 patches, consuming their resource of choice. After 15 days, we found that in the FM-wheat habitat, larvae  
334 typically occupied the same resource patch where they were placed as eggs (i.e. the natal resource; Figure 4A).  
335 Regardless of where they were placed as eggs, larvae that developed in the patchy FM-wheat habitat showed a  
336 consistently higher probability of choosing finger millet in the choice test (~40%; Figure 4B). Thus, prior contact  
337 with the finger millet even during exploration of the habitat was sufficient to induce a preference for finger  
338 millet. In contrast, in the RW-wheat habitat, most individuals that were initially placed in the refined wheat patch  
339 moved to the wheat patch over the course of development (Figure 4A). However, larvae initially placed in  
340 refined wheat did show a significantly higher preference for refined wheat compared to individuals placed in the  
341 wheat patch as eggs (Figure 4C). In this habitat, it appears that the natal resource induced larval preference.  
342 Hence, the relative use of the natal resource in a patchy habitat varies depending on the alternative resource  
343 available in that habitat.

344

### 345 **Induction of preference can be maladaptive for larval development**

346 What are the fitness consequences of larval preference induction? Earlier, we found that larvae that developed in  
347 a new resource did not pay a mortality cost, except in rice where larval mortality was significantly higher than in  
348 wheat (~65% survival in rice, ~80% in wheat; Figure S1). Finger millet and rice were both suboptimal for larval  
349 development rate (Figure S1). Of the four tested resources, the only resource that did not induce preference was  
350 rice flour, which is also the only resource that substantially decreases larval survival. However, we found that  
351 across resources, the magnitude of preference induction was not associated with larval development rate in those  
352 resources.

353  
354 In the experiments described above, we measured the fitness consequences of consuming a single resource  
355 throughout larval development. To simulate the fitness consequences of varying larval resource choice in a  
356 heterogeneous habitat, we transferred the larvae to a different resource for three developmental windows of one  
357 week each. This represents a scenario in which larvae move across resource patches every week. Thus, we could  
358 estimate the fitness consequences of larvae exerting preference and consuming different preferred resources over  
359 the course of their development. For example, to estimate the development rate of larvae that experienced finger  
360 millet in the second week of development in a heterogeneous habitat (containing wheat and finger millet  
361 patches), we allowed larvae to develop in wheat for one week, finger millet for the second, and wheat for the  
362 third. After allowing larvae to develop in these regimes, we measured the fraction of larvae that successfully  
363 pupated or eclosed as adults as a fitness proxy.

364  
365 We found that regardless of the treatment, nearly all larvae pupated within three weeks, and had similar rates of  
366 survival (Figure S10). Of the larvae that developed in wheat for the first two weeks of development, ~10% had  
367 also completed the pupal stage and eclosed as adults (Figure 5). However, almost none of the larvae that  
368 experienced finger millet during the first two weeks had eclosed as adults, showing significantly delayed  
369 development. These data suggest that an early preference for finger millet could delay larval development,  
370 suggesting that induction of preference for finger millet may be maladaptive for larvae.

371

## 372 **DISCUSSION**

373 Despite a large body of work on the induction of larval preference, we understand very little about the ecological  
374 significance of preference induction. One reason is the perception that larval preference is ecologically  
375 irrelevant, and that adult oviposition preference largely dictates larval performance in most herbivorous insects  
376 (Dethier 1959; Jaenike 1978). However, many studies have also emphasized larval participation in host choice –  
377 especially in highly heterogeneous habitats with multiple resources (Wiklund 1975; Chew 1977; Berdegue et al.  
378 1998; Mayhew 2001; Gamberale-Stille et al. 2014; Abbott & Dukas 2016) – and in determining their own fitness  
379 at finer spatial scales (Soler et al. 2012; Gamberale-Stille et al. 2014; Abbott & Dukas 2016). Here, we analyzed  
380 the impact of experience with resource heterogeneity on larval preference for new resources in *Tribolium*  
381 *castaneum*, a generalist pest. Our data show that red flour beetle larvae can exert a strong, but flexible, resource  
382 choice. We demonstrate that *T. castaneum* larvae fed on their ancestral wheat resource prefer wheat, but are more  
383 likely to choose a novel resource if they experienced it recently. The magnitude of this induction of preference  
384 for new resources varied across the four new resources that we tested. Preference induction is very specific and  
385 occurs even when alternate resources are presented simultaneously. Interestingly, induction of preference occurs  
386 readily for resources that delay larval development, but not for the one resource that substantially decreases  
387 larval survival. Thus, we show that induction of preference can play a powerful role in determining larval  
388 resource choice and altering their fitness in complex environments.

389

390 Our finding of resource-specific effect size of preference induction corroborates results from earlier studies with  
391 Lepidopteran larvae (Jermy et al. 1968; de Boer & Hanson 1984; Boer 1992; Silva et al. 2014), and suggests that  
392 such resource specificity in preference induction may be a general phenomenon. The variable magnitude of  
393 induction may be related to the mechanism underlying preference induction, which is partially characterized in  
394 only a few insects. In Lepidopterans such as *Manduca sexta* and *Pieris rapae*, as well as locusts, dietary  
395 experience can impact the peripheral sensory system by changing the sensitivity of gustatory receptor neurons  
396 (Abisgold & Simpson 1988; Zhou et al. 2009; Glendinning et al. 2015). It is also possible that the abundance of



397 specific compound(s) used by larvae for food recognition (del Campo et al. 2001) varies across resources,  
398 altering short-term recognition of these resources. The induction of preference with recent, brief experience (1  
399 day), and the observed resource specificity are both consistent with this hypothesis. Therefore, we speculate that  
400 the chemical composition of the different resources may determine the strength of preference induction.

401

402 An important feature of our experimental system was our ability to test the impact of experience with  
403 simultaneously experienced alternative resources. In phytophagous insects such as Lepidopterans that directly  
404 feed on plants, it is difficult to present a mix of different resources at the same time. *A priori*, we expected that  
405 experiencing a novel resource as part of a resource mix should weaken the induction of preference, compared to  
406 experiencing a pure novel resource. Our findings are consistent with this expectation. We observe that larvae  
407 discriminate not only between pure resources but also between a homogenous mix of these resources, preferring  
408 exactly what they experienced when it is available. This suggests that when two resources are experienced  
409 simultaneously in a mix, a strong preference is induced for a mix of these resources, over a pure form of either.  
410 Interestingly, larvae that experienced a balanced mix of a novel resource (finger millet) and the ancestral  
411 resource (wheat) strongly preferred 100% finger millet over 100% wheat. A simple expectation is that larvae  
412 should not discriminate between wheat and finger millet, having experienced an equal amount of both during  
413 development. In contrast, our results suggest that different components in a single mix have quantitatively  
414 different effects on larval preference, with the ancestral resource in the mix impacting larval preference much  
415 less than an equal mass of the novel resource. Thus, some novel resources (in this case, finger millet) can induce  
416 larval preference more strongly than the ancestral resource, indicating an asymmetry in the impact of different  
417 resources on insect preference. A similar phenomenon was observed in *Manduca sexta* larvae, where across  
418 choice combinations, acceptable non-host plants induced a stronger preference than host plants (Boer 1992).  
419 However, in this study, alternative hosts were presented separately and preference was not measured using  
420 choice assays. Interestingly, we found that the specificity of induced resource preference did not extend to the  
421 exact concentrations of the experienced mix (Figure S9). Our data do not distinguish between the alternate  
422 possibilities of whether larvae are incapable of distinguishing between different concentrations of resources, or

423 whether they do not discriminate between them. While experience with homogeneous mixes is probably not very  
424 common in nature, our data hint at the underlying mechanism of induction of preference in *T. castaneum* larvae,  
425 and are consistent with the hypothesis of additive resource-specific modifications in the sensory system leading  
426 to increased preference for a resource mix. However, we need further investigation of the exact mechanism of  
427 the induction of preference (Bernays & Weiss 1996; Anderson & Anton 2014).

428

429 An intriguing and novel finding from our work is that resource-specific induction of preference can also occur in  
430 a spatially heterogeneous habitat. Importantly, in this experiment, we found that larvae are capable of moving  
431 out of their natal resource, thereby impacting their own fitness. An earlier study with fruit flies also showed that  
432 larvae could move away from a suboptimal natal habitat chosen by their mother (Abbott & Dukas 2016).

433 However, in our experiments, larvae did not move away from finger millet, even though it significantly delays  
434 larval development. On the other hand, larvae avoided refined wheat, which confers similar larval survival and  
435 development rate as wheat. Similarly, previous work showed that flour beetle larvae reared in a wheat-corn  
436 patchy habitat preferred the suboptimal corn resource more strongly than larvae reared in a homogeneous wheat  
437 habitat (Parent et al. 2014). Our current results suggest that this suboptimal preference for corn may have been  
438 induced by prior exposure to corn. Together, these observations indicate that alternative resources experienced at  
439 a small spatial scale may alter larval preference, and possibly the fitness of developing larvae. Thus, our  
440 experiments provide new insights about the sensitivity of larval preference to their natal environment and nearby  
441 alternative resources and underscore the importance of studying larval preference in heterogeneous habitats.

442

443 By explicitly measuring larval resource preference, movement and fitness, we showed that larval resource use is  
444 strongly driven by resource-specific induction rather than the potential fitness consequences of their choice. On  
445 the one hand, the lack of induction with rice flour may be seen as adaptive, since larval survival is significantly  
446 lower in rice compared to the other resources (all of which showed significant preference induction; Figure S1).  
447 On the other hand, larval development rate was not correlated with the strength of preference induction across  
448 resources. For example, larval preference was most strongly induced by finger millet, a resource that decreases

449 development rate substantially. These results are similar to previous findings in *Manduca sexta*, where the  
450 strength of larval preference induction was not correlated with larval performance across hosts (Silva et al.  
451 2014). If beetle larvae acted on induced preference during early development, they would suffer a significant  
452 developmental delay (~10-18% lower eclosion rate at three weeks) compared to larvae that did not consume  
453 finger millet. Given these fitness consequences, optimally behaving larvae should move out of a finger millet  
454 patch, particularly during the first two weeks of development. However, our data show that this does not occur in  
455 a patchy habitat, possibly due to the strong induction by finger millet. Taken together, our experiments suggest  
456 that the induction of resource preference may be maladaptive, and may serve as a barrier to optimal resource  
457 choice in heterogeneous habitats.

458  
459 Is the induction of larval resource preference broadly relevant in insects? In the specific case of flour beetles,  
460 habitat heterogeneity and resource turnover is likely a common feature in stored grain warehouses, particularly  
461 where the parent populations used in this study were collected. However, we could not systematically measure  
462 temporal or spatial heterogeneity in the natural habitat of *Tribolium castaneum*, and we hope that future studies  
463 can quantify such heterogeneity. More generally, if insect larvae explore their habitats, they may often encounter  
464 local heterogeneity in patch quality (as in Abbott & Dukas 2016; Soler et al. 2012; Gamberalle-Stille et al.  
465 2014). Our data suggest that larval resource use in such heterogeneous habitats can be driven by several features  
466 of the habitat, such as spatial and temporal heterogeneity in resource availability. In this context, our experiments  
467 provide new insights about the sensitivity of larval preference to their environment and underscore the  
468 importance of studying larval preference in heterogeneous environments. Larval resource choice may also play  
469 an important role in the context of suboptimal maternal oviposition. A growing body of evidence suggests  
470 several constraints on optimal female oviposition in generalists (Charlery de la Masselière et al. 2017), such as  
471 search time, patch complexity, and the ability to receive and process sensory information (Janz & Nylin 1997;  
472 Mayhew 1997; Bernays 1999; Bernays & Funk 1999; Bernays 2001; Janz 2002). Thus, studying only  
473 oviposition preference in such habitats may not reliably predict larval resource use, and alternative resources  
474 experienced at a smaller spatial scale may alter the fitness outcomes for developing larvae.

475

476 In closing, we note that many questions regarding the ecological and evolutionary consequences of larval  
477 resource choice remain unanswered. This is primarily because larval choice has been underrepresented in studies  
478 of insect host choice. In general, studies of host preference have largely focused on Lepidopterans, which have a  
479 unique life history compared to other insect orders. More studies of insect host use across insect life stages and  
480 in non-Lepidopteran species may help us develop general principles of insect host choice and understand its  
481 implications for individual fitness. Experience based plasticity in larval resource choice may be an important  
482 mechanism through which rapid behavioural diet shifts can occur, either when female oviposition behaviour is  
483 suboptimal, or under conditions of habitat heterogeneity where larval resource availability fluctuates. Under such  
484 conditions, the induction of preference may enhance larval performance on suboptimal resources through  
485 increased feeding (Agrawal et al. 2002b). We find that induction of preference does not occur for a resource that  
486 substantially decreases larval survival. Therefore, this may well be a mechanism through which rapid niche  
487 expansion can occur within the larval stage of individuals, altering subsequent acceptability of the novel  
488 resource and allowing individuals to utilize and adapt to novel resources (West-Eberhard 1989). Preference  
489 induction may thus facilitate local adaptation in populations experiencing heterogeneity in resource availability.  
490 Our study represents the first systematic analysis of the impact of habitat heterogeneity on larval preference for  
491 new resources, and suggests its potential role in the evolution of diet breadth.

492

### 493 **Acknowledgements**

494 We thank members of the Agashe lab and Shannon Olsson for discussion and comments on the manuscript. This  
495 work was supported by the National Centre for Biological Sciences and an INSPIRE Faculty award to DA (IFA-  
496 13 LSBM-64).

497

### 498 **Author contributions**

499 DA, VRK and SI designed experiments; VRK and SI conducted experiments; VRK, SI and DA analyzed data;  
500 VRK and DA wrote the manuscript. All authors gave final approval for publication.

501

502 **References**

- 503 A. Fred West, Jr., 1960. The biology of a species of *Nosema* (Sporozoa : Microsporidia) parasitic in the flour  
504 beetle *Tribolium confusum*. *The Journal of Parasitology*, 46(6), pp.747–754.
- 505 Abbott, K.R. & Dukas, R., 2016. Substrate choice by ovipositing mothers and consequent hatchling behaviour:  
506 the exploration sharing hypothesis. *Animal Behaviour*, 121, pp.53–59. Available at:  
507 <http://dx.doi.org/10.1016/j.anbehav.2016.08.012>.
- 508 Abisgold, B.Y.J.D. & Simpson, S.J., 1988. The effect of dietary protein levels and haemolymph composition on  
509 the sensitivity of the maxillary palp chemoreceptors of locusts. *Journal of Experimental Biology*, 135,  
510 pp.215–229.
- 511 Agashe, D. & Bolnick, D.I., 2012. Dietary niche and population dynamic feedbacks in a novel habitat. *Oikos*,  
512 121(3), pp.347–356.
- 513 Agosta, S.J., 2006. On ecological fitting, plant-insect associations, herbivore host shifts, and host plant selection.  
514 *Oikos*, 114(3), pp.556–565.
- 515 Agrawal, A.A., Vala, F. & Sabelis, M.W., 2002. Induction of preference and performance after acclimation to  
516 novel hosts in a phytophagous spider mite : adaptive plasticity? *American Naturalist*, 159(5), pp.553–565.
- 517 Anderson, P. & Anton, S., 2014. Experience-based modulation of behavioural responses to plant volatiles and  
518 other sensory cues in insect herbivores. *Plant, Cell and Environment*, pp.1826–1835.
- 519 Berdegue, M., Reitz, S.R. & Trumble, J.T., 1998. Host plant selection and development in *Spodoptera exigua* :  
520 do mother and offspring know best ? *Entomologia Experimentalis et Applicata*, 89, pp.57–64.
- 521 Berdegue, M. & Trumble, J.T., 1996. Effects of plant chemical extracts and physical characteristics of *Apium*  
522 *graveolens* and *Chenopodium murale* on host choice by *Spodoptera exigua* larvae. *Entomologia*  
523 *Experimentalis et Applicata*, 78, pp.253–262.
- 524 Bernays, E.A., 2001. Neural limitations in phytophagous insects : implications for diet breadth and evolution of  
525 host affiliation. *Annual Review of Entomology*, 46, pp.703–727.
- 526 Bernays, E.A., 1999. When host choice is a problem for a generalist herbivore : experiments with the whitefly ,  
527 *Bemisia tabaci*. *Ecological Entomology*, pp.260–267.
- 528 Bernays, E.A. & Funk, D.J., 1999. Specialists make faster decisions than generalists : experiments with aphids.  
529 *Proceedings of the Royal Society of London B*, 266(1999), pp.151–156.
- 530 Bernays, E.A. & Weiss, M.R., 1996. Induced food preferences in caterpillars: the need to identify mechanisms.  
531 *Entomologia Experimentalis et Applicata*, 78, pp.1–8.
- 532 Blaser, M. & Schmid-Hempel, P., 2005. Determinants of virulence for the parasite *Nosema whitei* in its host  
533 *Tribolium castaneum*. *Journal of invertebrate pathology*, 89, pp.251–257.

- 534 Boer, G. de, 1992. Diet-induced food preference by *Manduca sexta* larvae: acceptable non-host plants elicit a  
535 stronger induction than host plants. *Entomologia Experimentalis et Applicata*, 63, pp.3–12. Available at:  
536 <http://doi.wiley.com/10.1111/j.1570-7458.1992.tb02414.x>.
- 537 de Boer, G. & Hanson, F.E., 1984. Foodplant selection and induction of feeding preference among host and non-  
538 host plants in larvae of the tobacco hornworm *Manduca sexta*. *Entomologia Experimentalis et Applicata*,  
539 35(2), pp.177–193.
- 540 Campbell, J.F. & Hagstrum, D.W., 2002. Patch exploitation by *Tribolium castaneum* : movement patterns,  
541 distribution and oviposition. *Journal of Stored Products Research*, 38, pp.55–68.
- 542 del Campo, M. & Renwick, J.A.A., 2000. Induction of host specificity in larvae of *Manduca sexta* : chemical  
543 dependence controlling host recognition and developmental rate. *Chemoecology*, 10, pp.115–121.
- 544 del Campo, M.L., Miles, C.I., Schroeder, F.C., Mueller, C., Booker, R., Renwick, J.A., 2001. Host recognition by  
545 the tobacco hornworm is mediated by a host plant compound. *Nature*, 411, pp.186-189.
- 546 Carlsson, M.A., Anderson, P., Hartlieb, E., Hansson, B., 1999. Experience-dependent modification of  
547 orientational response to olfactory cues in larvae of *Spodoptera littoralis*. *Journal of Chemical Ecology* ,  
548 25(11), pp.2445–2454.
- 549 Charlery de la Masselière, M., Facon B., Hafsi, A., Duyck, P., 2017. Diet breadth modulates preference -  
550 performance relationships in a phytophagous insect community. *Scientific Reports*, 7(16934), p.1-9.  
551 Available at: <http://www.nature.com/articles/s41598-017-17231-2>.
- 552 Chew, F.S., 1977. Coevolution of pierid butterflies and their cruciferous foodplants II - The distribution of eggs  
553 on potential foodplants. *Evolution*, 31(3), pp.568–579.
- 554 Dethier, V.G., 1959. Egg-laying habits of Lepidoptera in relation to available food. *The Canadian Entomologist*,  
555 91(9), pp.554-561
- 556 Gamberale-Stille, G., Soderlind, L., Janz, N. and Nylin, S., 2014. Host plant choice in the comma butterfly-larval  
557 choosiness may ameliorate effects of indiscriminate oviposition. *Insect Science*, 21(4), pp.499–506.
- 558 Glendinning, J.I., Ensslen, S., Eisenberg, M.E., Weiskopf, P., 1999. Diet-induced plasticity in the taste system of  
559 an insect : Localization to a single transduction pathway in an identified taste cell, *The Journal of*  
560 *Experimental Biology*, 202, pp.2091–2102.
- 561 Gretes, W.C., Stanwyck, E.A. & Hanson, F.E., 2016. Innate and acquired components of oligophagy in the  
562 herbivorous lepidopteran, *Manduca sexta*. *Entomologia Experimentalis et Applicata*, 160(3), pp.259–271.
- 563 Gripenberg, S., Mayhew, P.J., Parnell, M., Roslin, T., 2010. A meta-analysis of preference–performance  
564 relationships in phytophagous insects. *Ecology Letters*, 13, pp.383–393.
- 565 Hagstrum, D.W. & Gilbert, E.E., 1976. Emigration rate and age structure dynamics of *Tribolium castaneum*  
566 populations during growth phase of a colonizing episode. *Environmental Entomology*, 5(3), pp.445–448.
- 567 Henniges-Janssen, K., Heckel, D.G. & Groot, A.T., 2014. Preference of diamondback moth larvae for novel and  
568 original host plant after host range expansion. *Insects*, pp.793–804.

- 569 Jaenike, J., 1978. On optimal oviposition behavior in phytophagous insects, *Theoretical Population Biology*,  
570 14(3), pp.350–356.
- 571 Janz, N., 2002. Evolutionary ecology of oviposition strategies. In : Hilker, M. and Meiners, T., editors  
572 Chemoecology of insect eggs and egg deposition, Blackwell Verlag GmbH, pp.349–376.
- 573 Janz, N. & Nylin, S., 1997. The role of female search behaviour in determining host plant range in plant feeding  
574 insects : a test of the information processing hypothesis. *Proceedings of the Royal Society B*, pp.701–707.
- 575 Jermy, T., Hanson, F. & Dethier, V.G., 1968. Induction of specific food preference in Lepidopterous larvae.  
576 *Entomologia Experimentalis et Applicata*, 11, pp. 211–230.
- 577 Karowe, D.N., 1989. Facultative monophagy as a consequence of prior feeding experience : behavioral and  
578 physiological specialization in *Colias philodice* larvae. *Oecologia*, 78, pp.106–111.
- 579 Mayhew, P.J., 1997. Adaptive patterns of host-plant selection by phytophagous insects. *Oikos*, 79(3), pp.417–  
580 428. Available at: <http://www.jstor.org/stable/3546884>.
- 581 Mayhew, P.J., 2001. Herbivore host choice and optimal bad motherhood. *Trends in Ecology and Evolution*,  
582 16(4), pp.165–167.
- 583 Naylor, A.F., 1961. Dispersal in the red flour beetle *Tribolium castaneum* (Tenebrionidae). *Ecology*, 42(2),  
584 pp.231–237.
- 585 Parent, C.E., Agashe, D. & Bolnick, D.I., 2014. Intraspecific competition reduces niche width in experimental  
586 populations. *Ecology and Evolution*, pp.3978–3990.
- 587 Phillips, W.M., 1977. Modification of feeding “preference” in the flea beetle, *Haltica lythri* (Coleoptera,  
588 Chrysomelidae). *Entomologia Experimentalis et Applicata*, 21(1), pp.71–80. Available at:  
589 <http://doi.wiley.com/10.1111/j.1570-7458.1977.tb02658.x>.
- 590 Schoonhoven, L.M., 1967. Loss of hostplant specificity by *Manduca sexta* after rearing on an artificial diet.  
591 *Entomologia Experimentalis et Applicata*, 10, pp.270–272.
- 592 Schoonhoven, L.M. & Meerman, J., 1978. Metabolic costs of changes in diet and neutralization of  
593 allelochemicals, 24, pp.489–493.
- 594 Scriber, J.M., 1979. The effects of sequentially switching foodplants upon biomass and nitrogen utilization by  
595 polyphagous and stenophagous *Papilio* larvae. *Entomologia Experimentalis et Applicata*, 25(1979),  
596 pp.203–215.
- 597 Silva, A.K., Lopes Goncalves, G. & Rudinei Pires Moreira, G., 2014. Larval feeding choices in heliconians :  
598 induced preferences are not constrained by performance and host plant phylogeny. *Animal Behaviour*, 89,  
599 pp.155–162. Available at: <http://dx.doi.org/10.1016/j.anbehav.2013.12.027>.
- 600 Singer, M.C. & McBride, C.S., 2010. Multitrait, host-associated divergence among sets of butterfly populations:  
601 implications for reproductive isolation and ecological speciation. *Evolution*, 64(4), pp.921–933.
- 602 Sokoloff, A., 1974. The Biology of *Tribolium*, with Special Emphasis on Genetic Aspects, Vol. 2. Oxford  
603 University Press, Oxford, UK.



- 604 Soler, R., Pineda, A., Li, Y., Ponzio, C., J. A. van Loon, J., Weldegergis, B.T., Dicke M., 2012. Neonates know  
605 better than their mothers when selecting a host plant. *Oikos*, 121(12), pp.1923–1934.
- 606 West-Eberhard, M.J., 1989. Phenotypic plasticity and the origins of diversity. *Annual Review of Ecology and*  
607 *Systematics*, 20, pp.249–278.
- 608 Wiklund, C., 1975. The evolutionary relationship between adult oviposition preferences and larval host plant  
609 range in *Papilio machaon* L., *Oecologia*, 18, pp.185-197.
- 610 Yamamoto, R.T., 1974. Induction of hostplant specificity in the tobacco hornwork, *Manduca sexta*. *Journal of*  
611 *Insect Physiology*, 20, pp.641–650.
- 612 Zhou, D.-S., Wang, C.-Z. & Loon, J.J.A. van, 2009. Chemosensory basis of behavioural plasticity in response to  
613 deterrent plant chemicals in the larva of the small cabbage white butterfly *Pieris rapae*, *Journal of Insect*  
614 *Physiology*, 55, pp.788–792.
- 615 Ziegler, J.R., 1977. Dispersal and reproduction in *Tribolium* : The influence of food level. *Journal of Insect*  
616 *Physiology*, 23, pp.955–960.
- 617 Ziegler, J.R., 1976. Evolution of the migration response : emigration by *Tribolium* and the influence of age.  
618 *Evolution*, 30, pp.579–592.



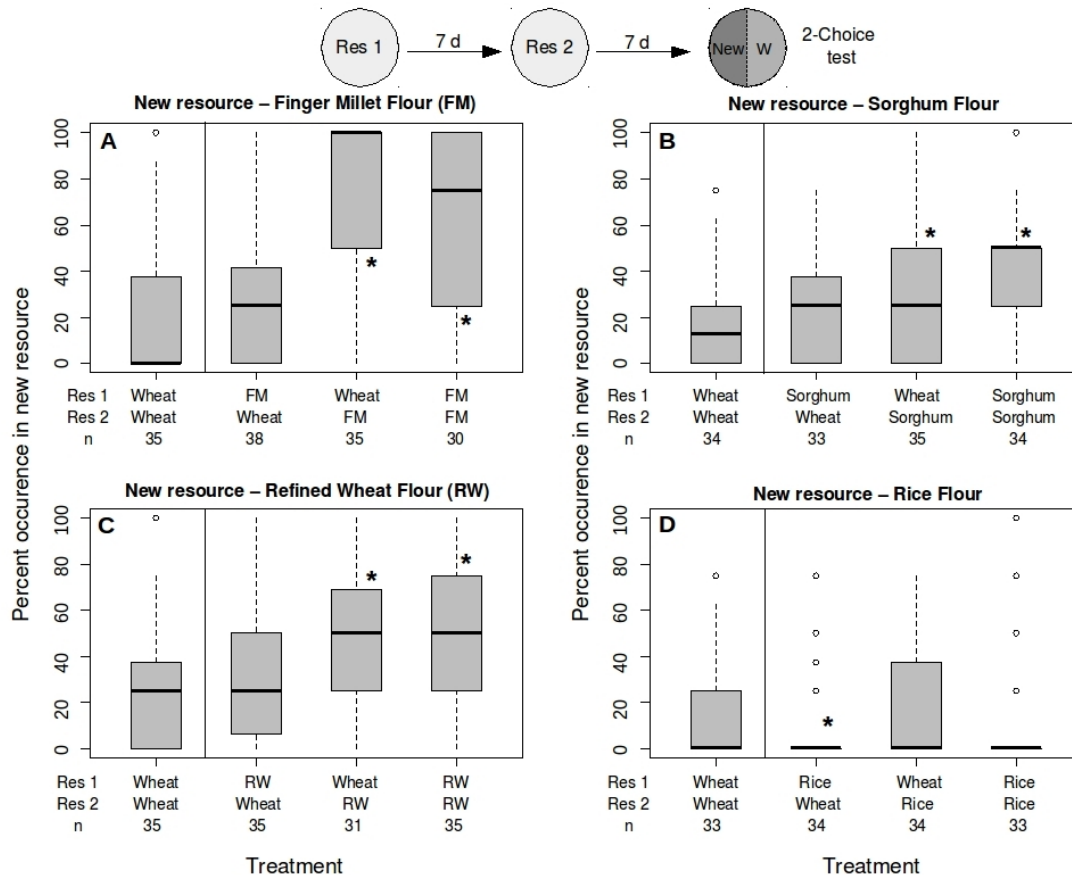

619 **Figure 1: Induction of larval resource preference with two different resources presented sequentially**

620 **during development.** Each panel shows preference of single larvae for a novel resource when given a choice

621 between the ancestral resource (wheat, "W") and the novel resource for 48 hours. Percent occurrence in a novel

622 resource was calculated based on 4 readings of larval patch occupancy. The novel resources in each panel are (A)

623 finger millet flour (B) sorghum flour (C) refined wheat flour (D) rice flour. Larvae were reared in resource 1 for

624 the first week, and resource 2 in the second week (x-axis). In each panel, the left bar represents a control

625 treatment where larvae were never exposed to the novel resource until the choice test. Numbers below each

626 boxplot indicate sample size. Asterisks indicate treatments that differ from the control ( $p < 0.05$ , generalized

627 linear model with binomially distributed errors). Boxplots indicate median and first and third quartiles, and

628 whiskers indicate the range of data. All figures with boxplots follow this convention.

629

630

631

632

633

634

635

636

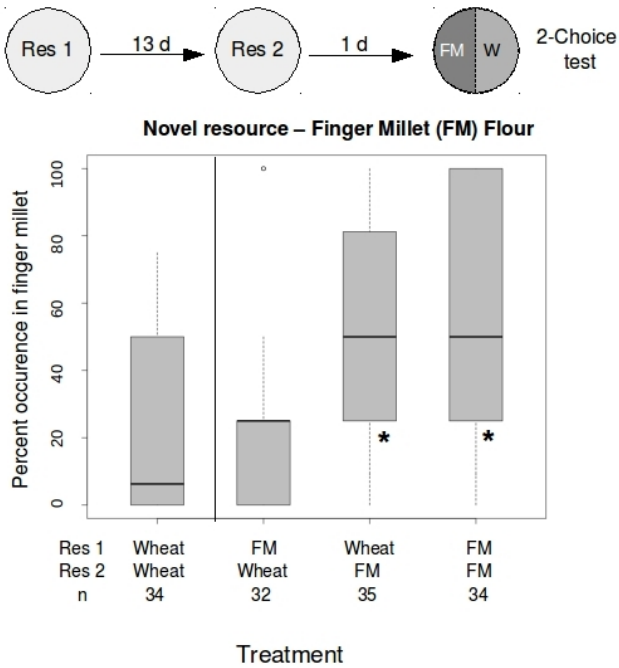

**Figure 2: Induction of preference for finger millet**

**occurs in a short time.** Larvae were reared in resource

1 for 13 days and then resource 2 for 1 day (x-axis).

Larval preference was measured as described in Fig 1.

Boxplots represent data as described in Figure 1.

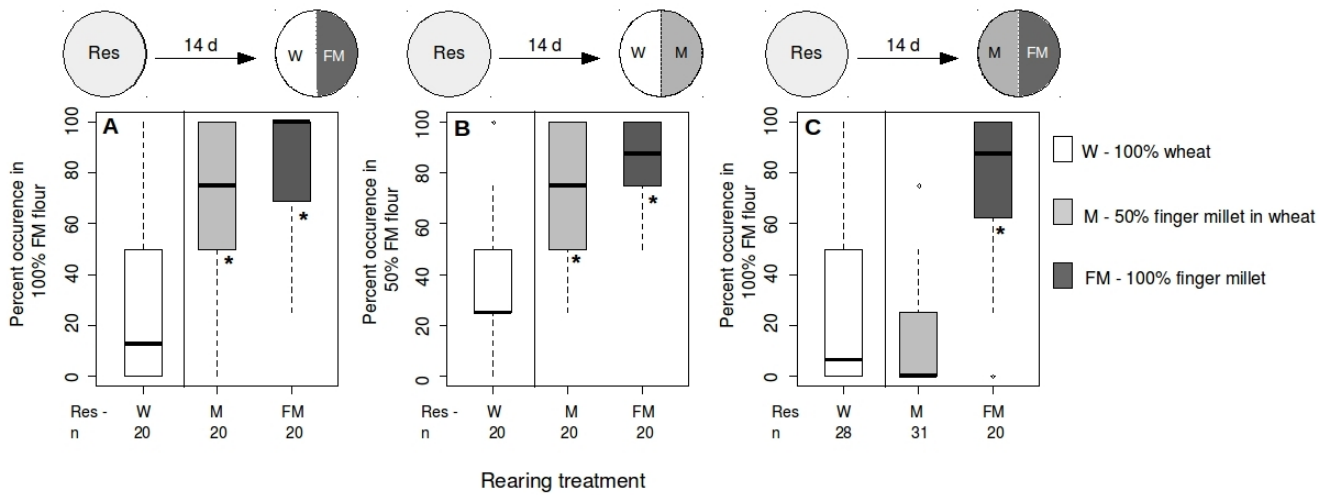

638 **Figure 3: Induction of preference also occurs with a mixture of finger millet and wheat flour.** Each panel  
639 shows preference of single larvae for a resource mix with the higher concentration (by mass) of finger millet  
640 flour when given a choice between various combinations among 100% wheat flour (white), 1:1 mix of finger  
641 millet flour and wheat (light grey) and 100% finger millet flour (dark grey) for 48 hours. Larval preference was  
642 measured as described in Figure 1. The choice combinations in each panel are (A) 100% wheat versus 100%  
643 finger millet (B) 100% wheat versus 50% finger millet and (C) 50% finger millet versus 100% finger millet.  
644 Larvae were reared in each treatment (x-axis) for 14 days. Boxplots represent data as described in Figure 1.

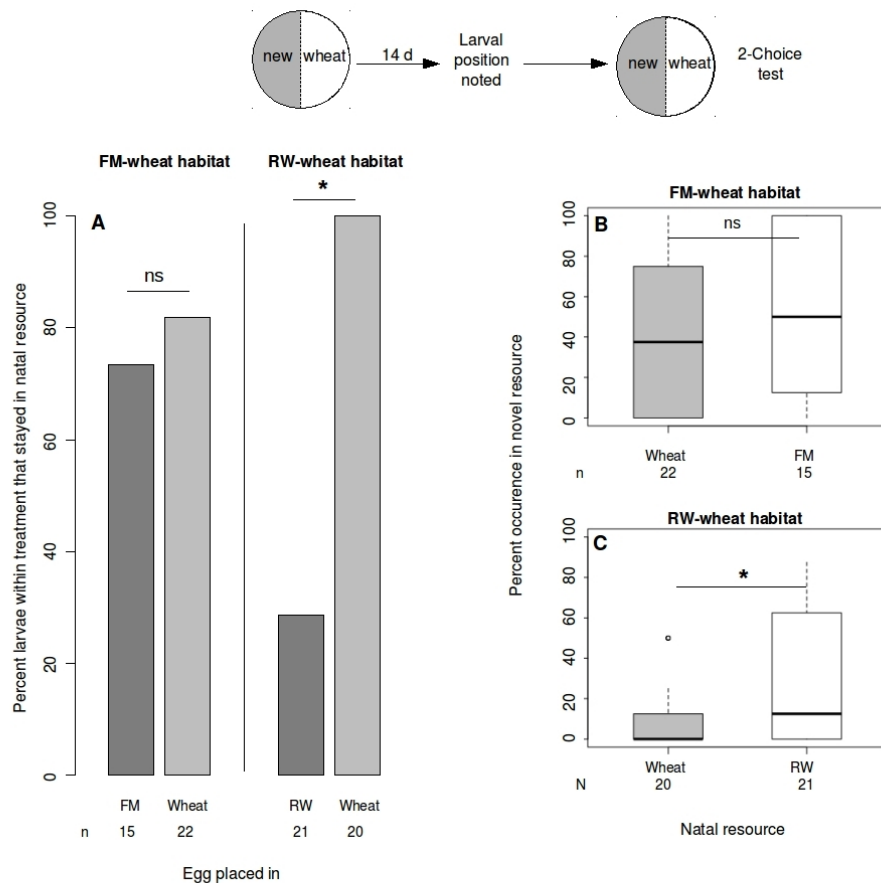

646 **Figure 4: Larval preference for new resources after development in a heterogeneous two-patch habitat.**

647 Individual eggs were placed in one patch of a two-patch heterogeneous habitat, and larvae were allowed to  
648 develop allowing for unrestricted movement across patches. (A) Percentage of larvae found in the same patch  
649 they hatched into (natal resource) in either an FM-wheat (left) or an RW-wheat (right) patchy habitat after 14  
650 days of development. Asterisks indicate a significant difference between the indicated treatments ( $p < 0.05$ ,  
651 pairwise two-sided chi-squared test of proportions with Yates' continuity correction). The new resource in  
652 subsequent preference tests on the 15<sup>th</sup> day was either (B) finger millet (FM) or (C) refined wheat (RW) flour.  
653 Larvae within each treatment are split along the x-axis according to their natal resource. The y-axis denotes  
654 larval preference for the natal resource. Asterisks indicate a significant difference in percent occurrence in the  
655 new resource across individuals in different natal resources. ( $p < 0.05$ , generalised linear model with binomially  
656 distributed errors). Boxplots represent data as described in Figure 1.

657

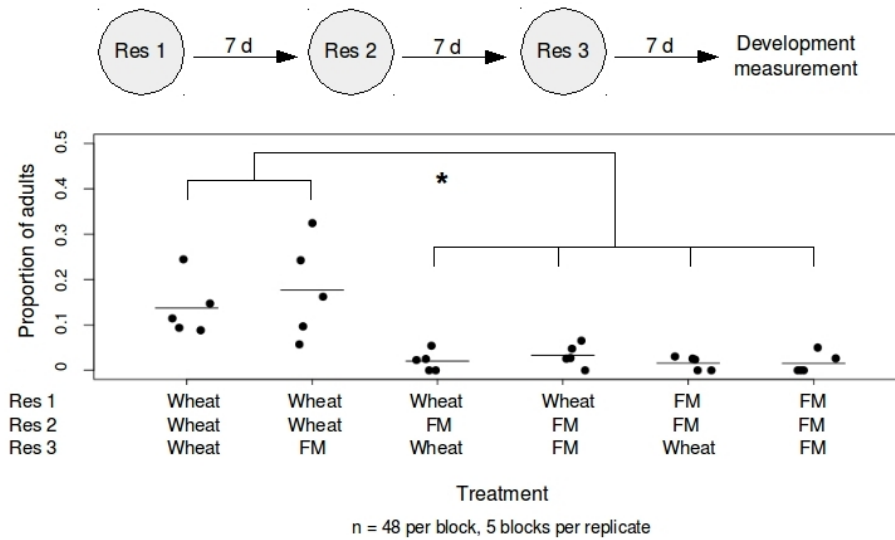

658 **Figure 5: Development rate of larvae as a function of their respective developmental experience.** Each  
659 point represents data for a single experimental block. Within each block, individual eggs (n = 48 per  
660 developmental regime) were placed in each of the treatments represented along the x-axis. The y-axis represents  
661 the proportion of individuals that had eclosed as adults on the 21<sup>st</sup> day. Lines within the scatter represent mean of  
662 the data. Asterisks indicate significant difference in development rate between treatments as represented (p <  
663 0.05, generalized linear model with binomially distributed errors)
